# Supplementary figures and images for: Metal–metal bonding in molecular actinide compounds: electronic structure of [M2X8]2−(M = U, Np, Pu; X = Cl, Br, I) complexes and comparison with d-block analogues
Source: Royal Society of Chemistry journal article supplement (doi:10.1039/b613446g), 2006-01-01

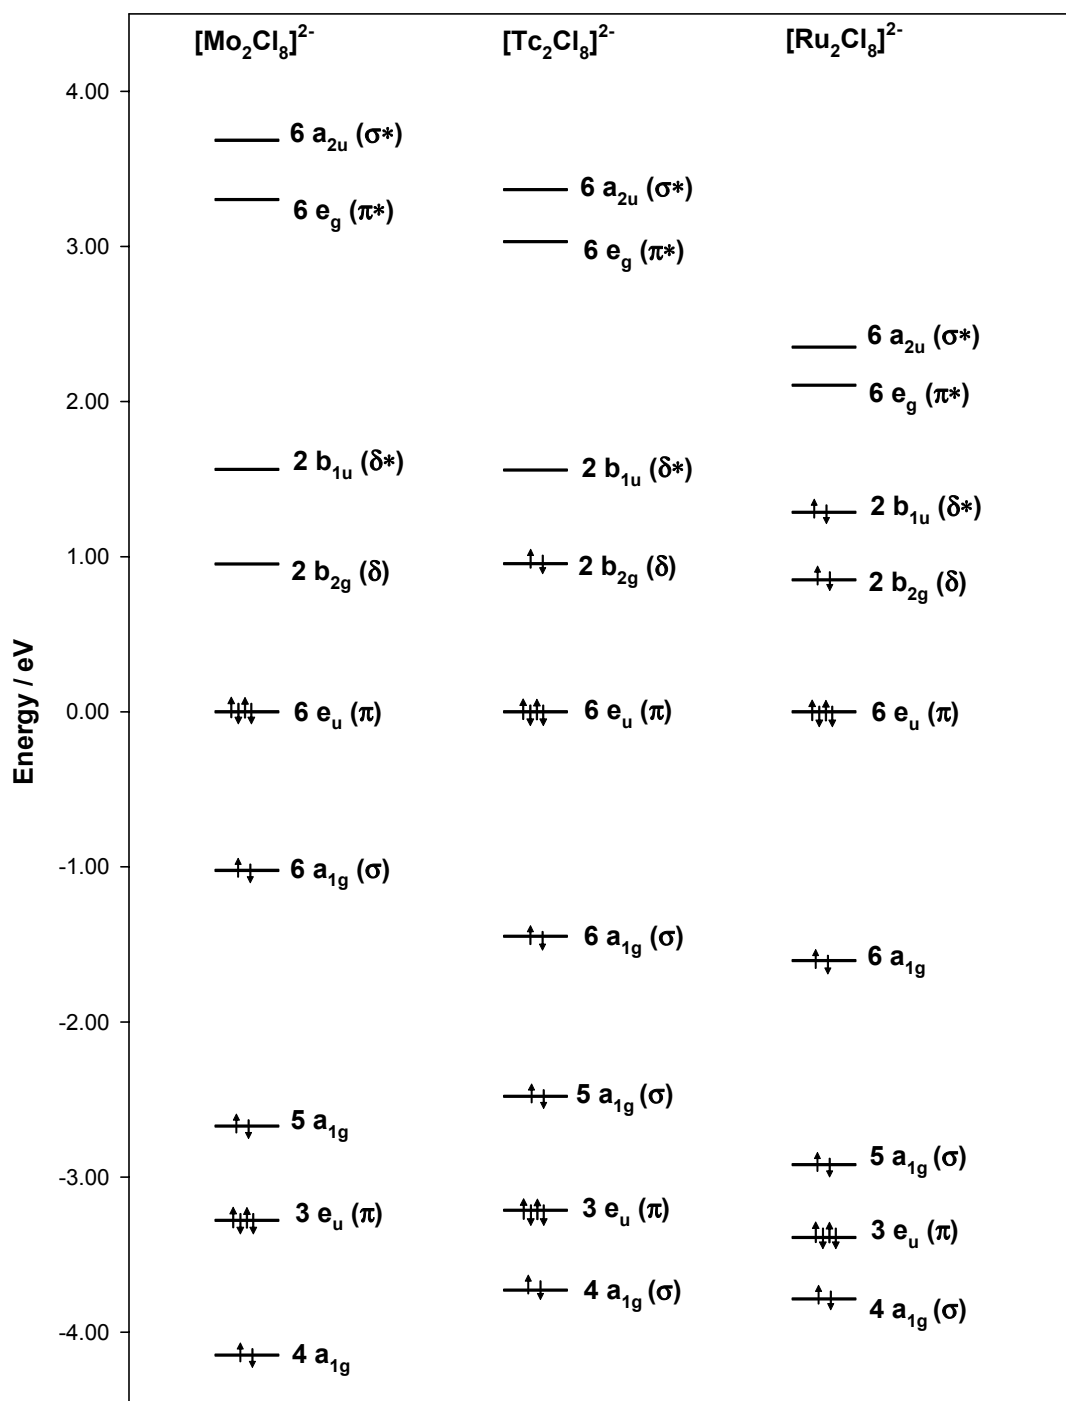

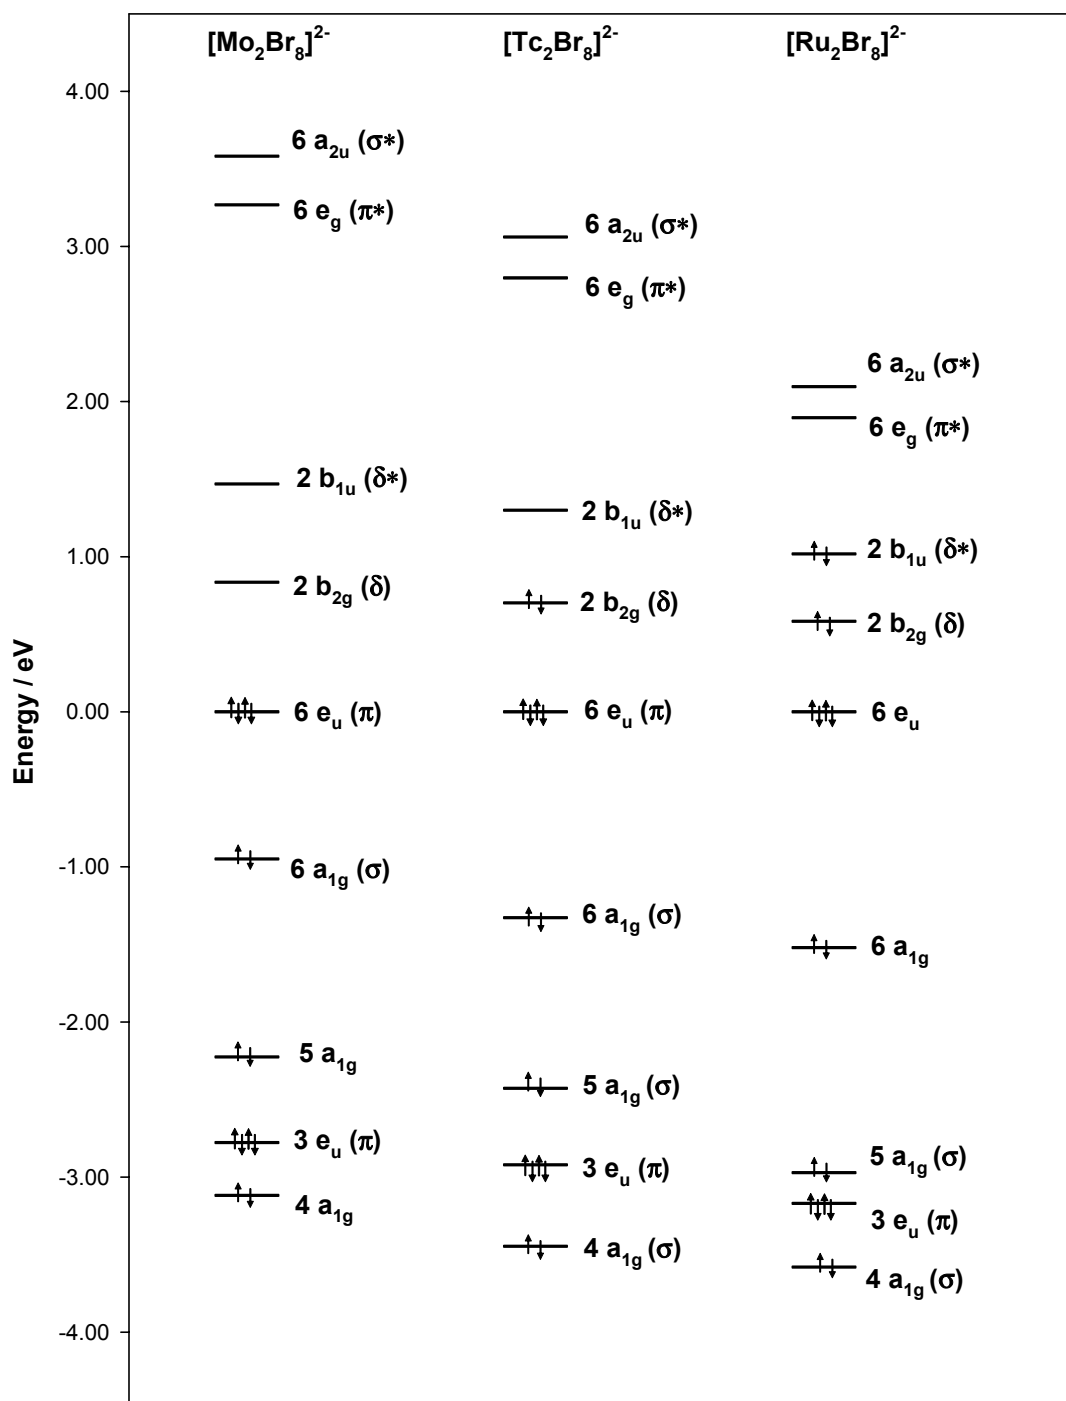

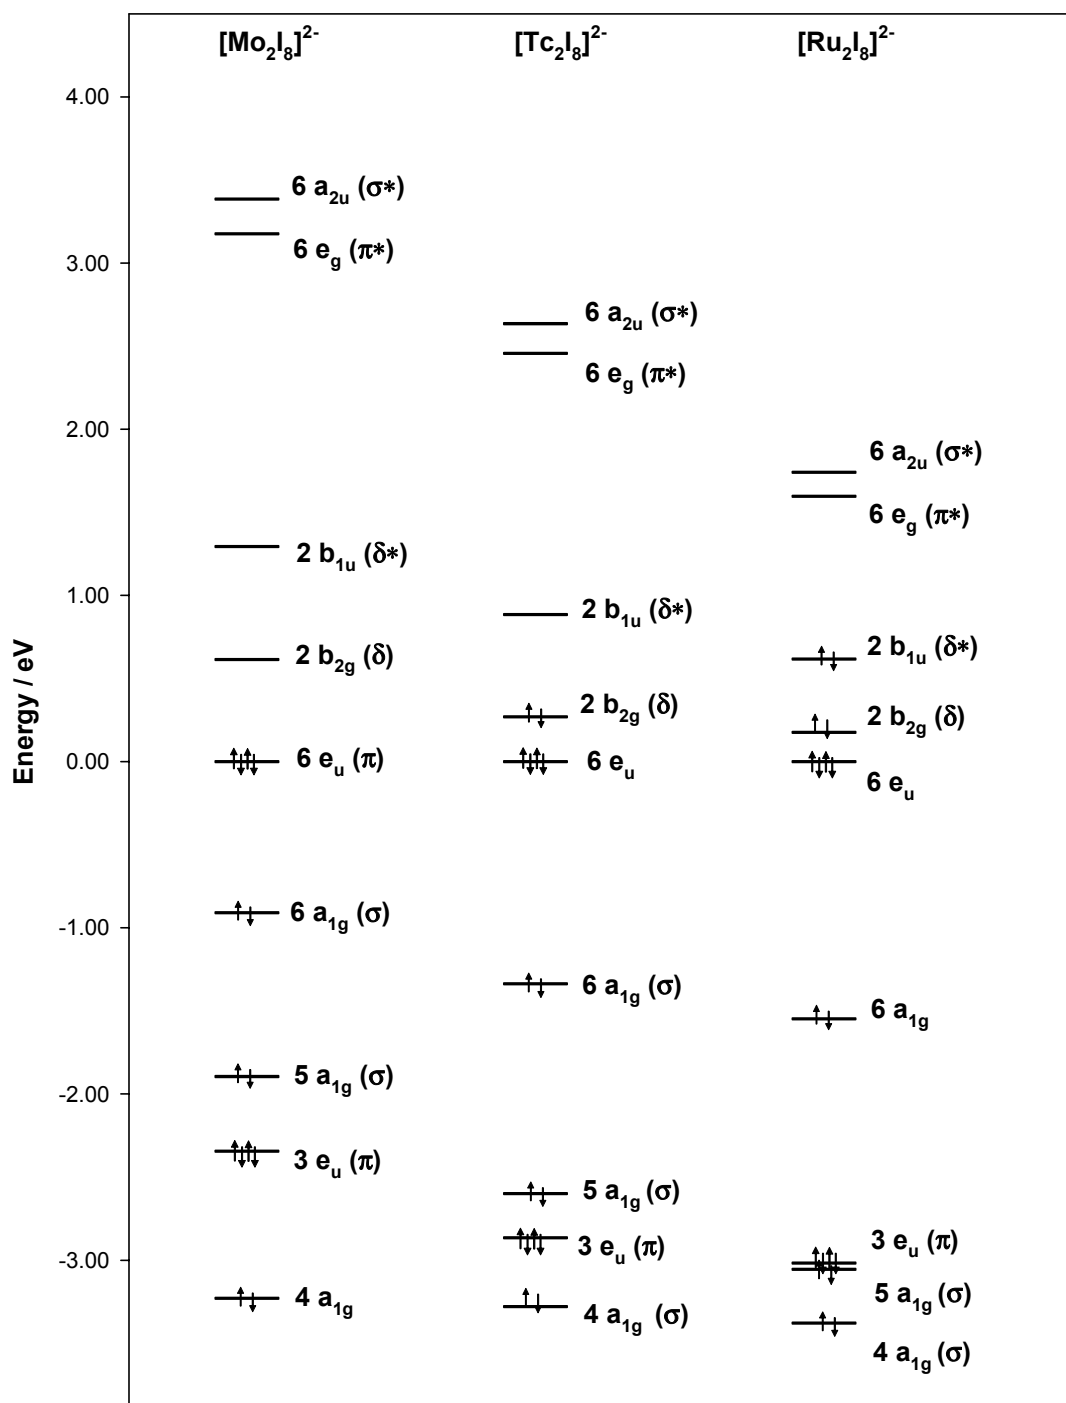

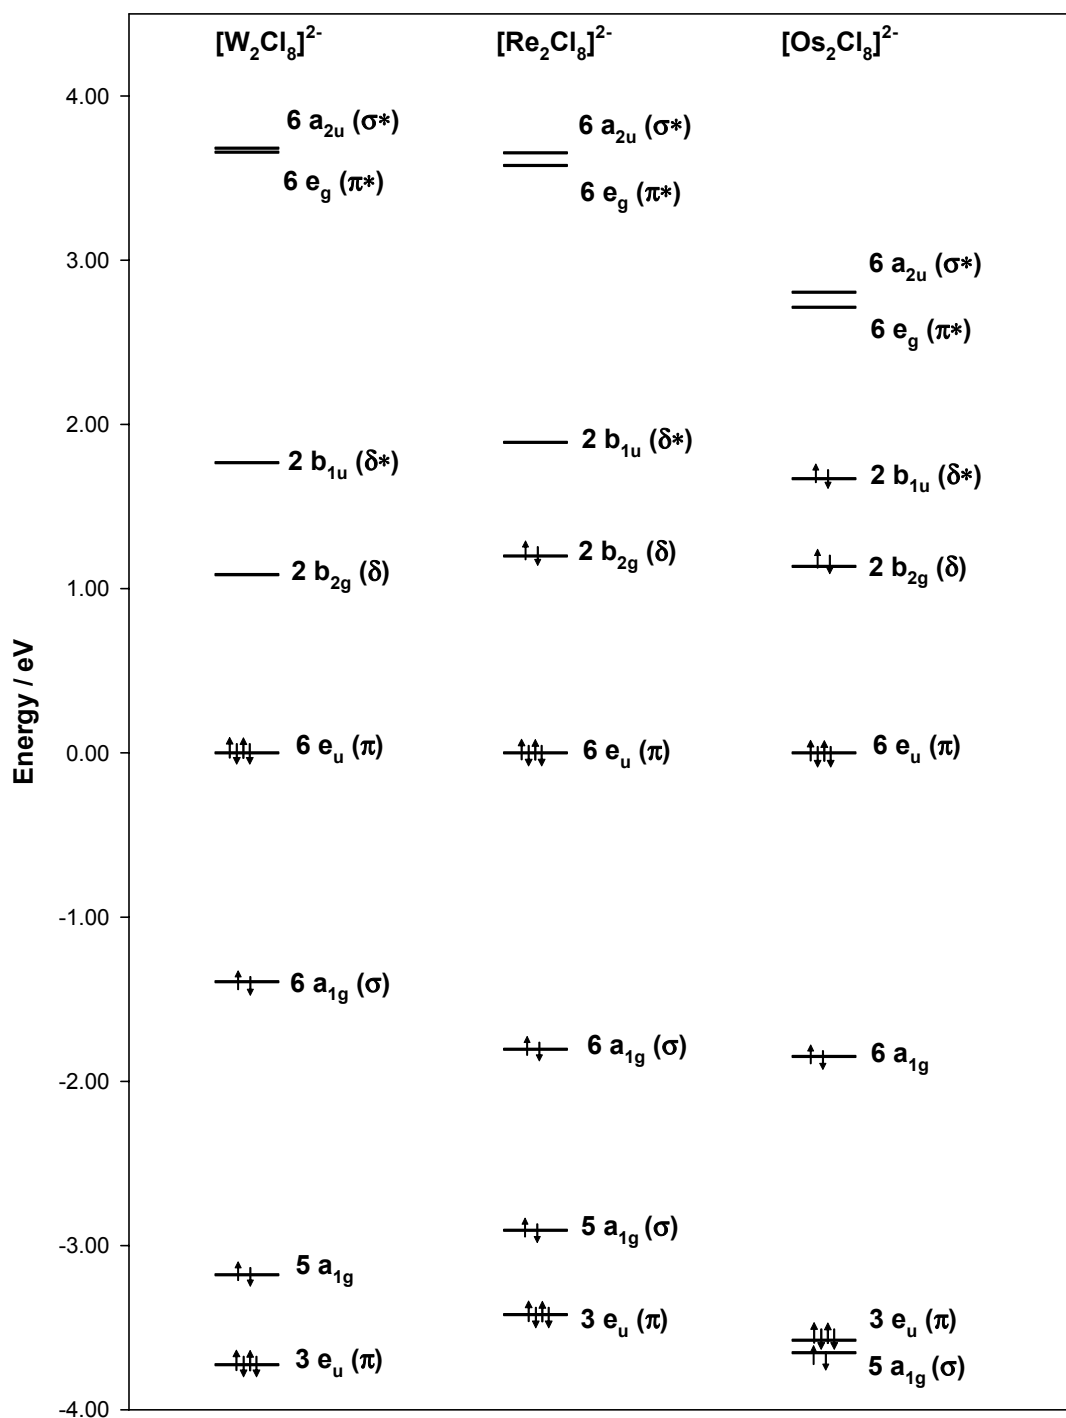

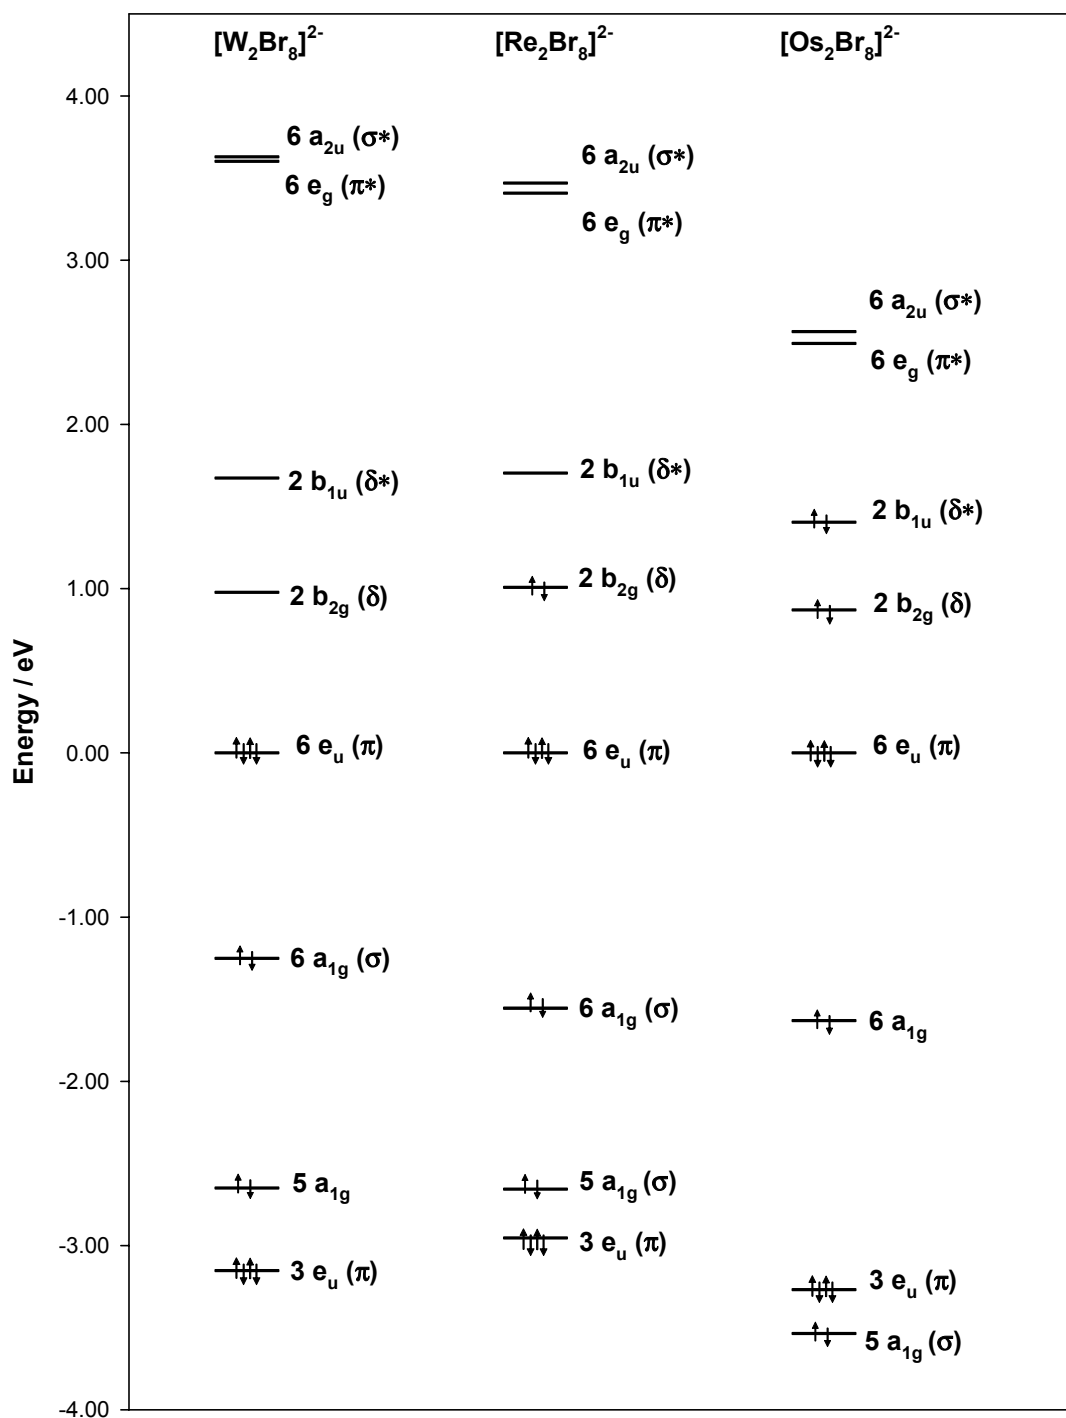

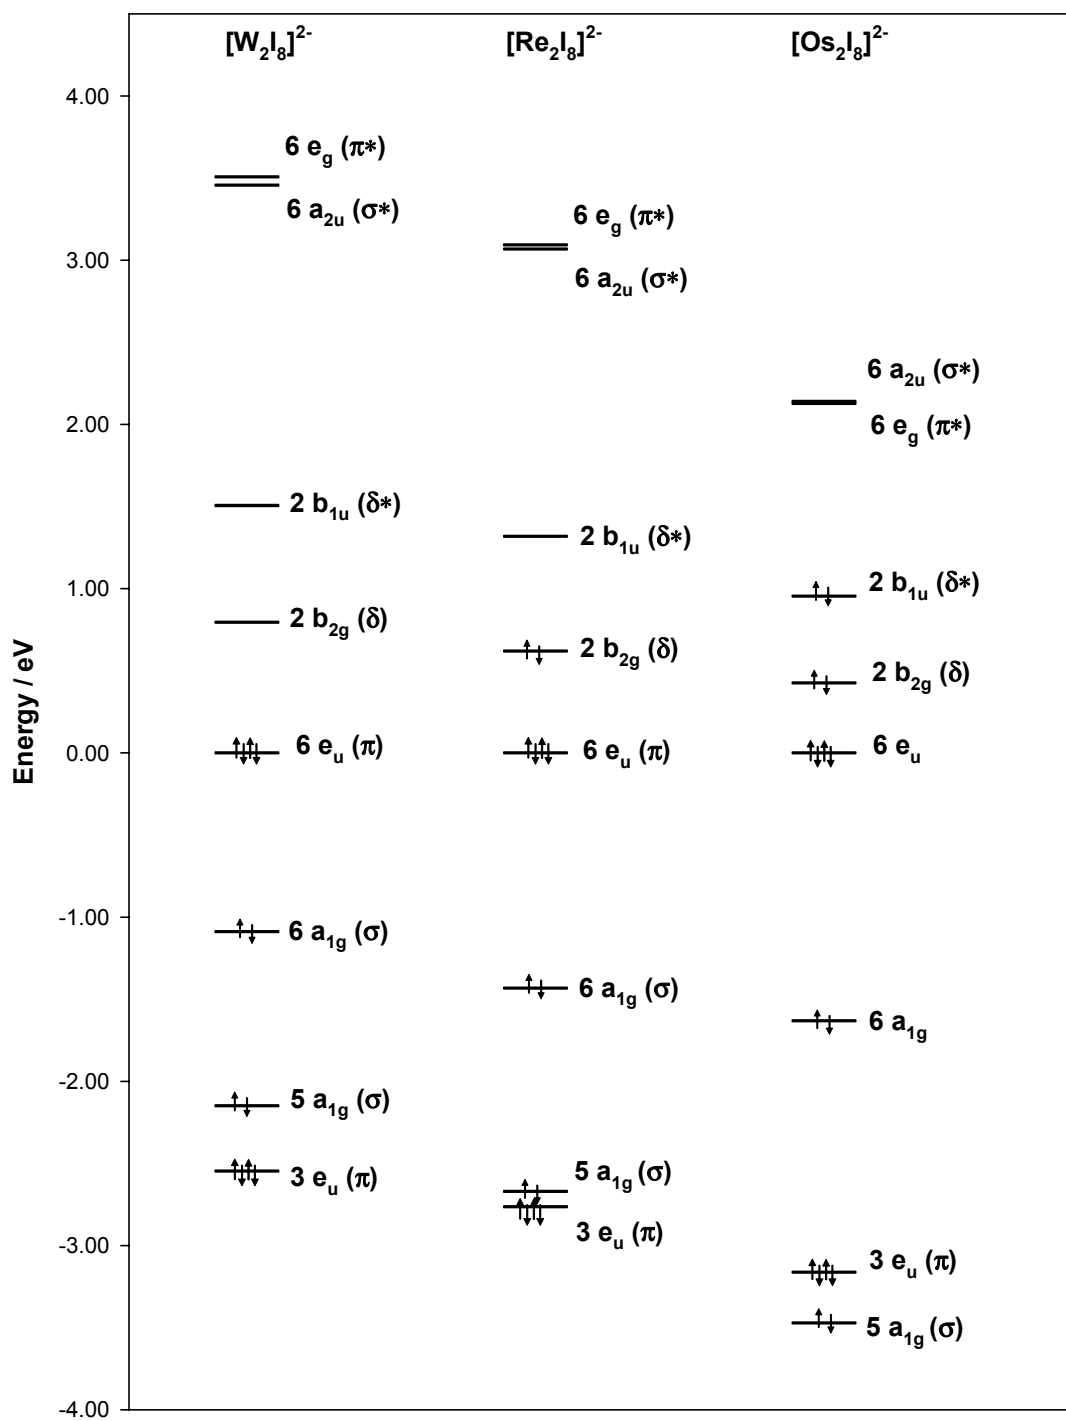

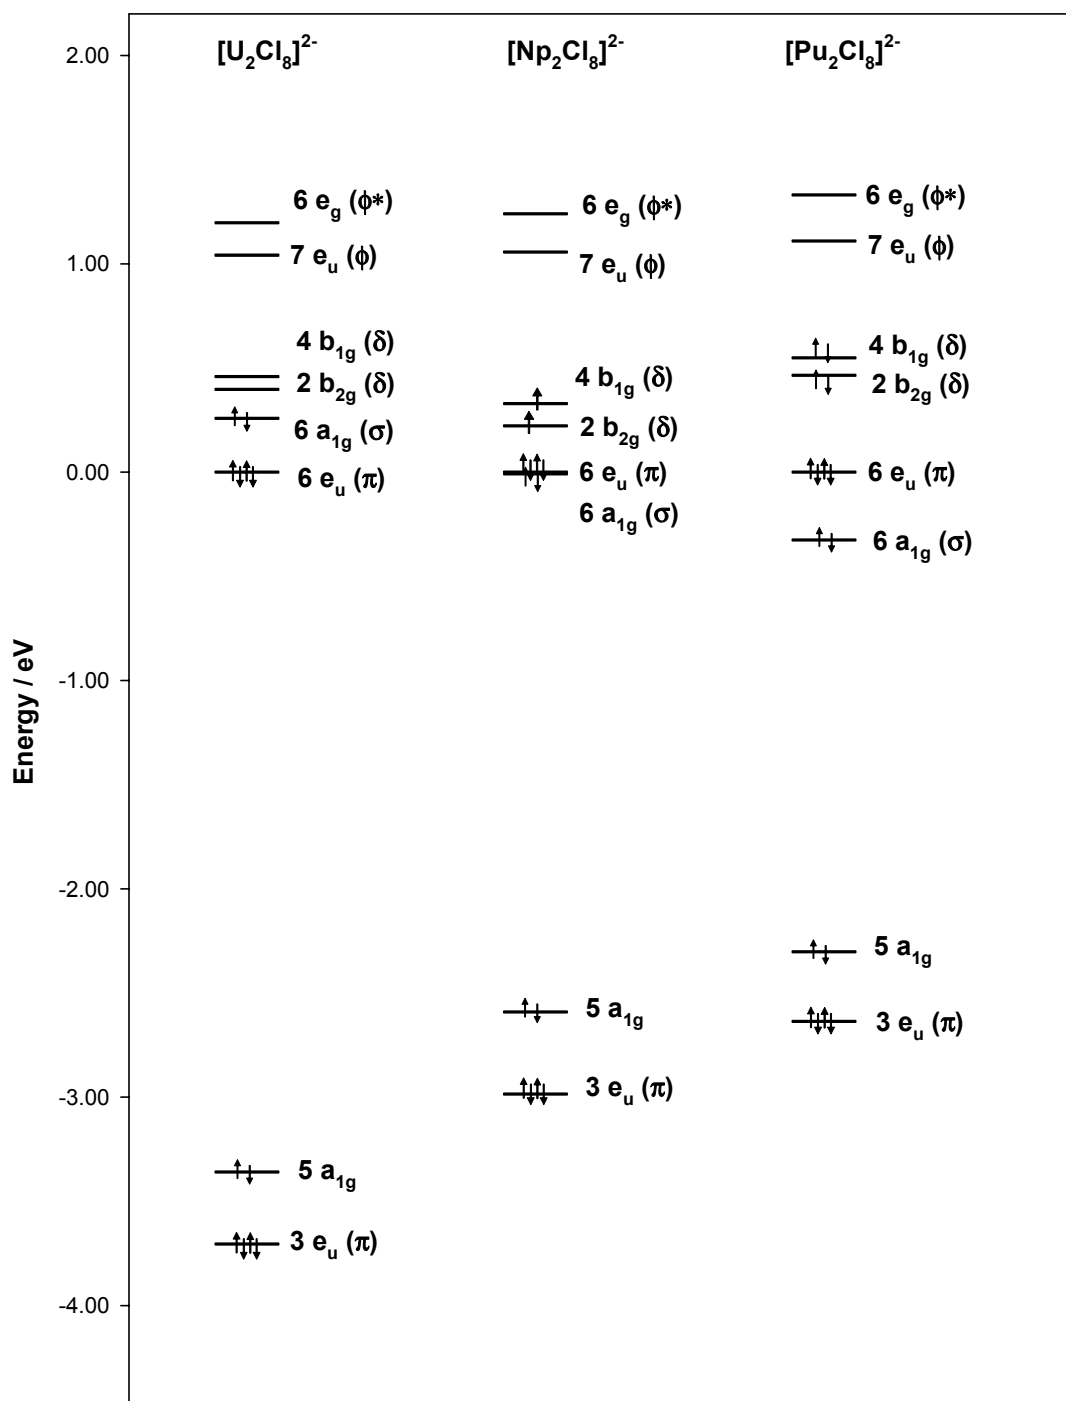

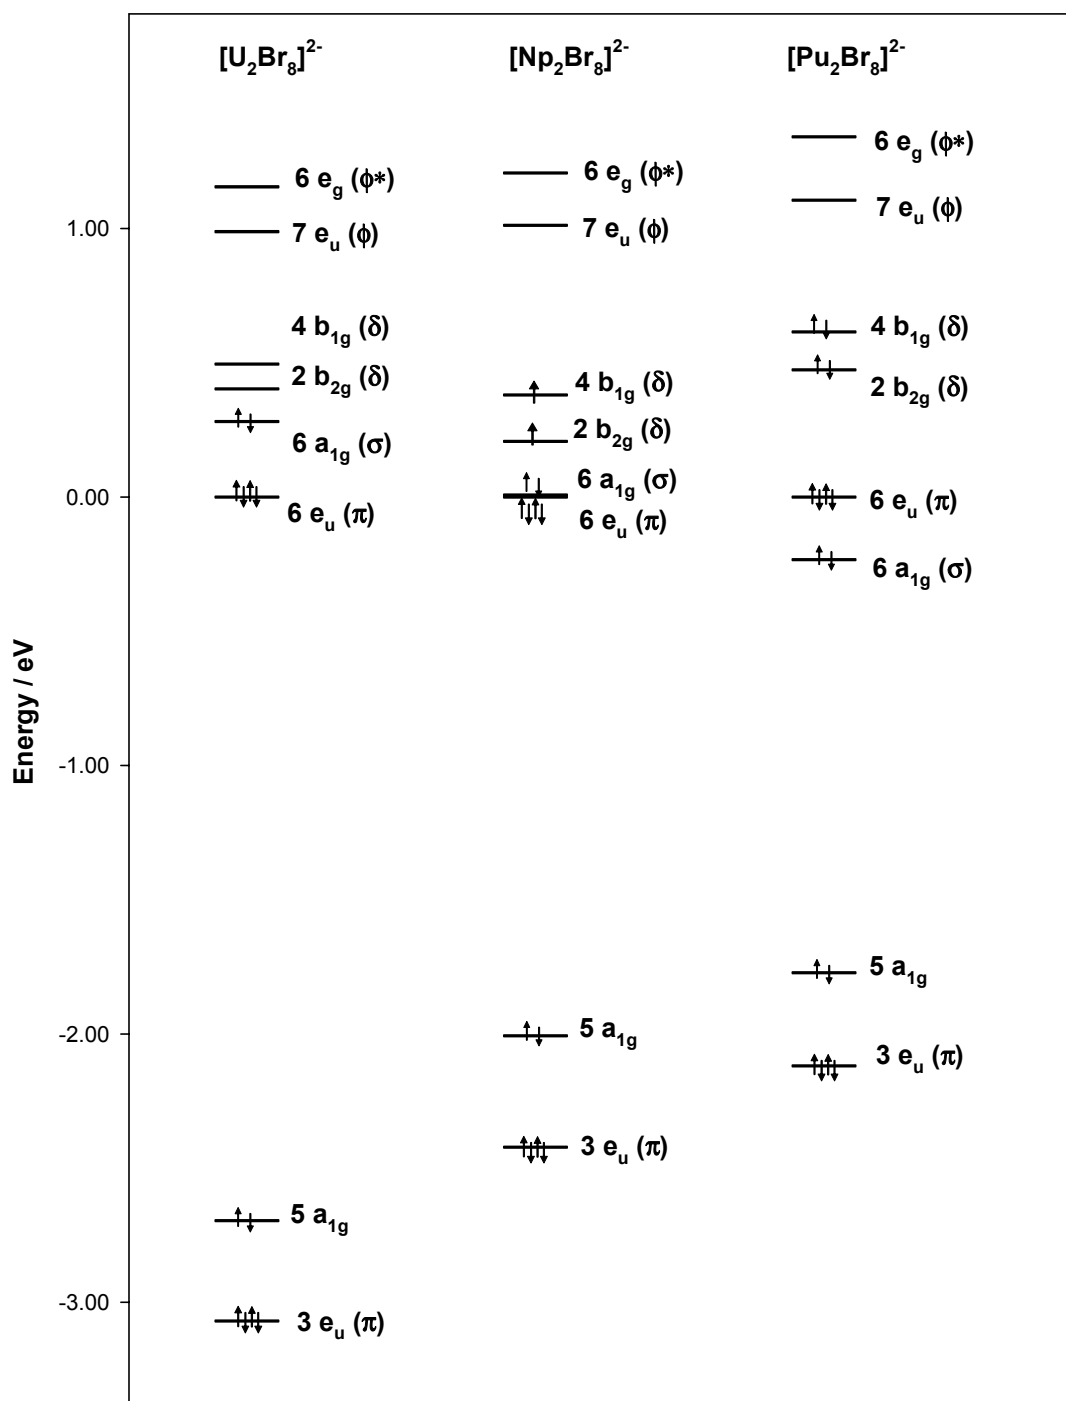



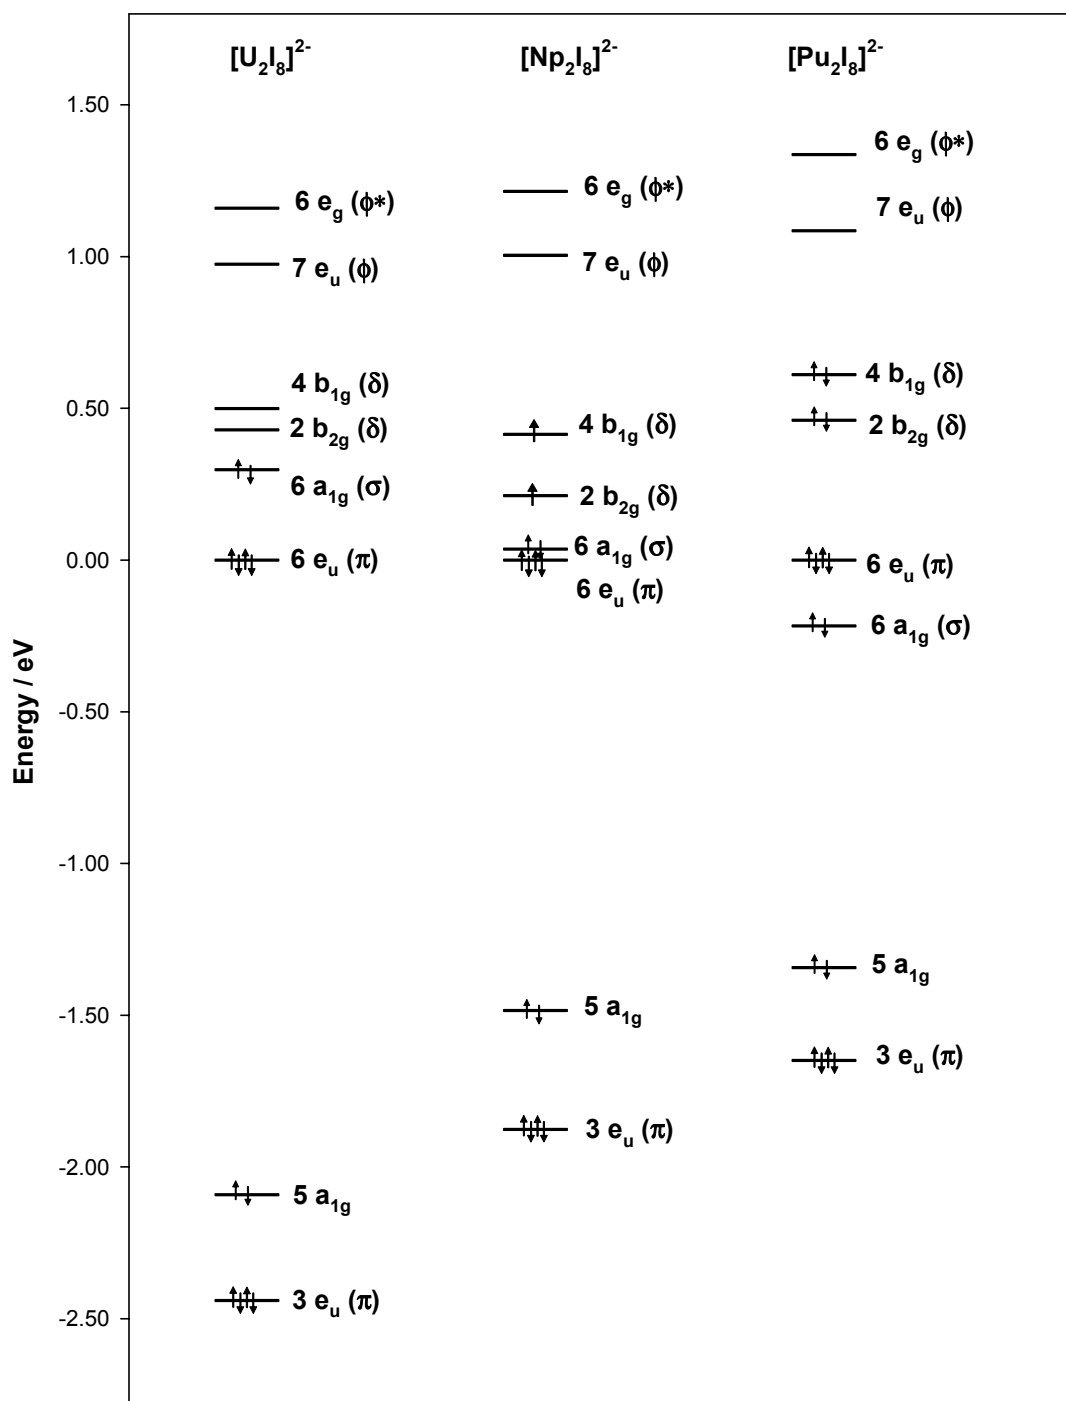

Supplement: b613446g.pdf [file b613446g.pdf]
